# Supplementary material
Source: PubMed Central journal article supplement (PMC6192874)
Supplement: NIHMS940850-supplement-supplement_1.pdf [file NIHMS940850-supplement-supplement_1.pdf]

Evaluation of a community intervention to reduce exposure of young children living in farmworker households to organophosphate pesticides

Authors

William C. Griffith, Ph.D.<sup>a,b</sup>, Eric M. Vigoren, MS<sup>a,b</sup>, Marissa N. Smith, MS<sup>a,b\*</sup>, Tomomi Workman, BS<sup>a,b\*</sup>, Beti Thompson, Ph.D.<sup>c</sup>, Gloria D. Coronado, Ph.D.<sup>d</sup>, Elaine M. Faustman, Ph.D.<sup>a,b</sup>

<sup>a</sup>Department of Environmental and Occupational Health Sciences, School of Public Health, University of Washington, Seattle, WA

<sup>b</sup>Washington Institute for Risk Analysis & Risk Communication, University of Washington, Seattle, WA

<sup>c</sup>Cancer Prevention Program, Fred Hutchinson Cancer Research Center, Seattle, WA

<sup>d</sup>Kaiser Permanente Center for Health Research, Portland, OR

Correspondence to:

Elaine M. Faustman

Department of Environmental and Occupational Health Sciences

School of Public Health

University of Washington

4225 Roosevelt Way NE Suite 100

Seattle, WA 98105

Fax: (206) 685-4696

E-mail: faustman@uw.edu

Running Title: Intervention reducing child exposure

[This publication was made possible by grants PO1 ES009601 from NIEHS, and EPA RD-83170901, RD826886, *RD83451401*, RD-83273301.]

Supplemental Information

Table S1: Total Active Ingredients Applied in Washington State in 1999, 2001 and 2003.  
Data are shown in pounds.

|                       | 1999          | 2001          | 2003          |
|-----------------------|---------------|---------------|---------------|
| azinphos-methyl-apple | 309,300       | 241,400       | 289,200       |
| Phosmet-apple         | 46,000        | 138,300       | 70,700        |
| Malathion-apple       | 22,300        | 1,600         | Not Available |
| azinphos-methyl-pear  | 33,000        | 22,800        | 28,700        |
| Phosmet-pear          | 11,500        | 29,900        | 18,800        |
| Malathion-pear        | Not available | Not available | Not available |
| Total                 | 422,100       | 434,000       | 407,400       |
